# Supplementary material
Source: PubMed Central journal article supplement (PMC1172243)

*MFRP* Genomic PCR amplification

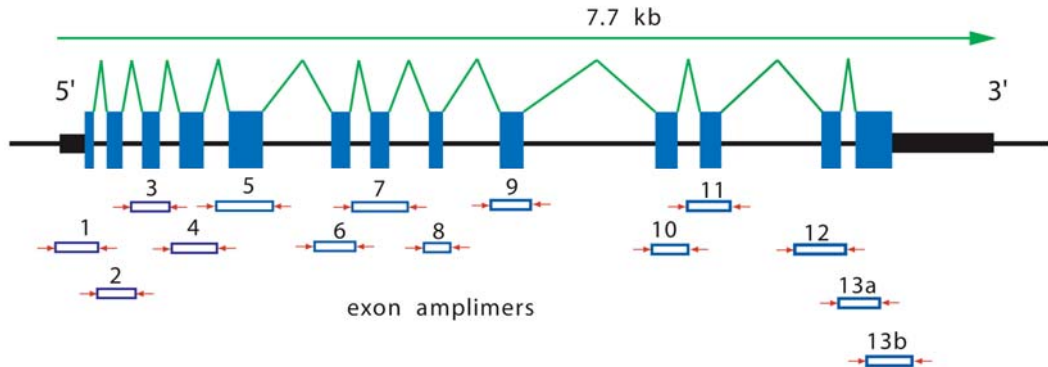

Supplement: pnas_0501451102_2.pdf [file pnas_0501451102_2.pdf]

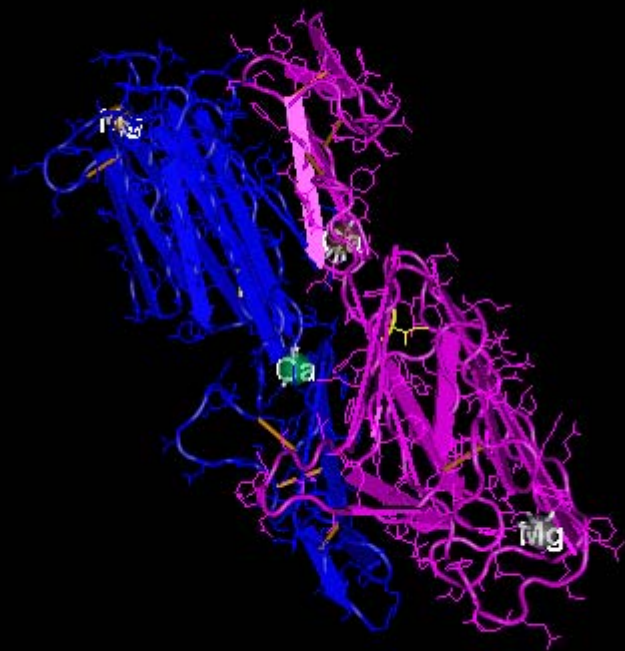

Supplement: pnas_0501451102_3.pdf [file pnas_0501451102_3.pdf]
